# Supplementary material for: Phenotypic Variation in Clinical S. aureus Isolates Did Not Affect Disinfection Efficacy Using Short-Term UV-C Radiation
Source: MDPI journal article supplement (doi:10.3390/microorganisms11051332), 2023-05-18
Supplement: s1 [file s1]

## Supplementary Figure

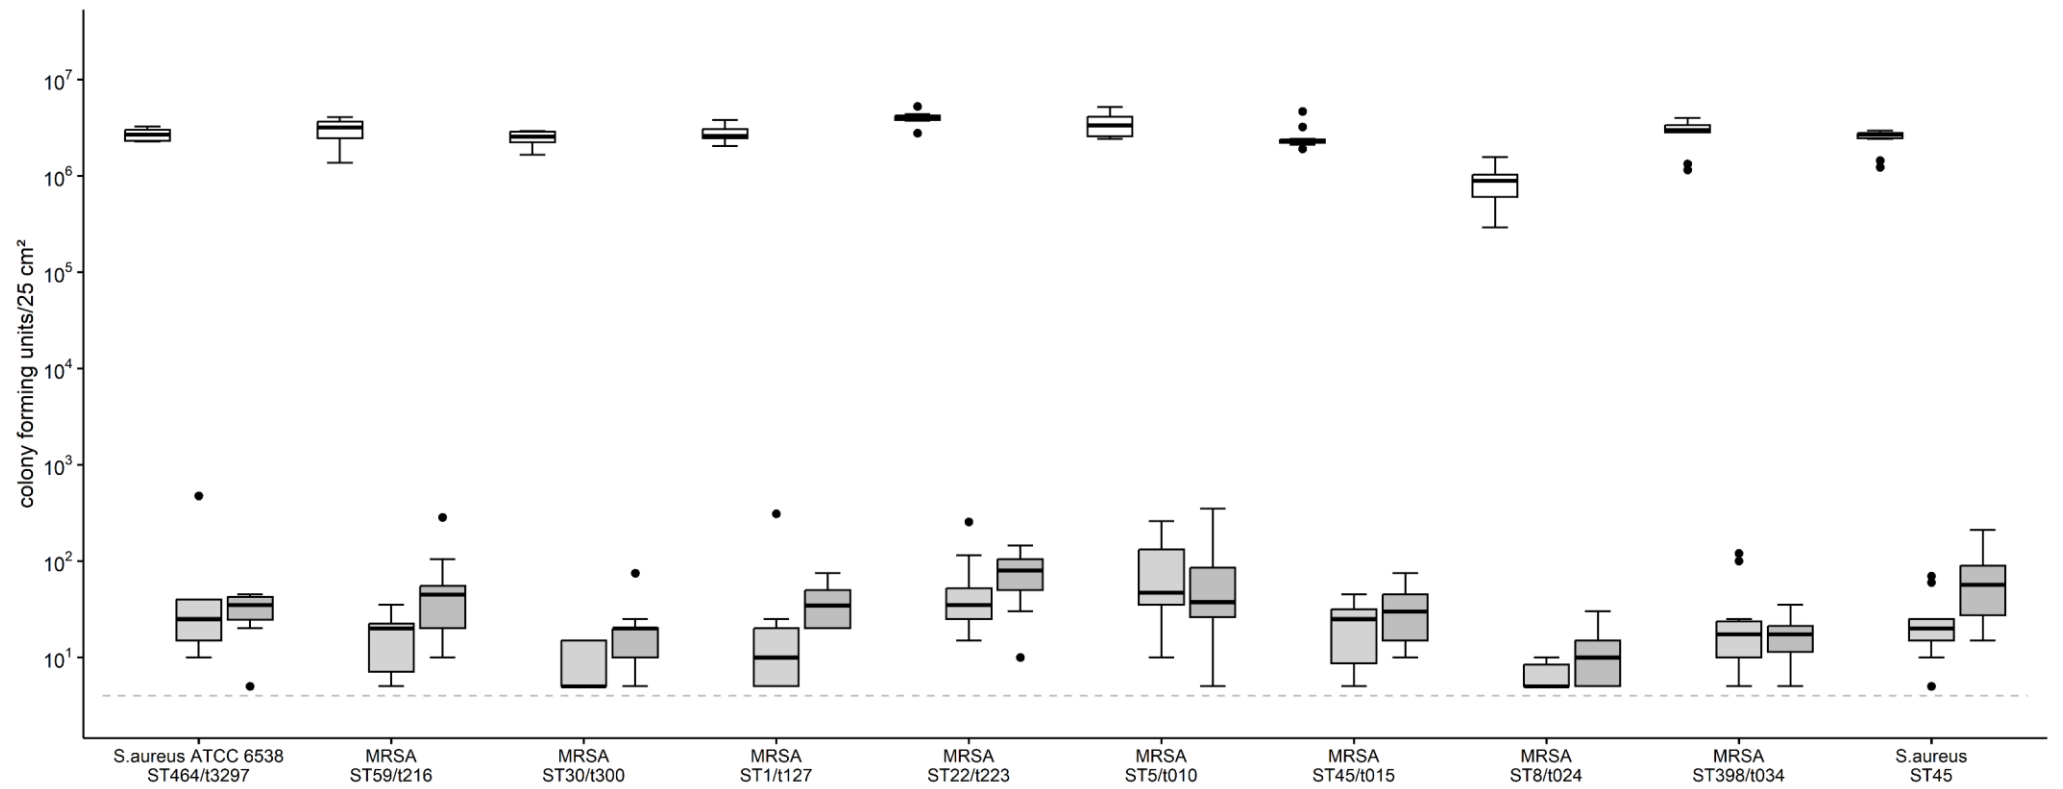

**Figure S1.** Bacterial contamination of surface before and after UV-C radiation with different UV-C doses. The white filled boxplots represent number of colony forming units on 25cm<sup>2</sup> ceramic tiles before UV-C disinfection. Light-grey and grey filled boxplots display the bacterial contamination after UV-C radiation with 50 and 22 mJ/cm<sup>2</sup>, respectively. Each boxplot contains 10 values determined in five independent experiments. The dashed line shows the detection limit of 5 cfu/cm<sup>2</sup>.
