# Supplementary material for: Phenotypic Variation in Clinical S. aureus Isolates Did Not Affect Disinfection Efficacy Using Short-Term UV-C Radiation
Source: MDPI journal article supplement (doi:10.3390/microorganisms11051332), 2023-05-18
Supplement: s1 [file s1]

**Supplementary Table S1.** Phenotypic and genotypic resistance in the investigated strains (only antibiotics with detected resistance mechanisms are displayed)

| strain          | aminoglycoside         |                        | beta-lactams           |            |                       | fluoroquinolones       |              |                       | MLS                         |              |                         |                       | tetracyclin            |                       |
|-----------------|------------------------|------------------------|------------------------|------------|-----------------------|------------------------|--------------|-----------------------|-----------------------------|--------------|-------------------------|-----------------------|------------------------|-----------------------|
|                 | phenotype <sup>a</sup> | genotype <sup>b</sup>  | phenotype <sup>a</sup> |            | genotype <sup>b</sup> | phenotype <sup>a</sup> |              | genotype <sup>b</sup> | phenotype <sup>a</sup>      |              |                         | genotype <sup>b</sup> | phenotype <sup>a</sup> | genotype <sup>b</sup> |
|                 | gentamycin             |                        | cefoxitin-screen       | oxacillin  |                       | ciprofloxacin          | moxifloxacin |                       | clindamycin IR <sup>c</sup> | Erythromycin | cindamycin              |                       | teracyclin             |                       |
| MRSA ST5/t010   | ≤ 0.5 (S)              | aadD, bleO             | positive               | ≥ 4 (R)    | blaZ, mecA            | ≤ 0.5 (I)              | ≤ 0.25 (S)   | -                     | negative                    | ≤ 0.25 (S)   | ≤ 0.25 (S)              | -                     | ≥ 16 R                 | tet(M)                |
| MRSA ST8/t024   | ≤ 0.5 (S)              | -                      | positive               | ≥ 4 (R)    | blaZ, mecA            | ≤ 0.5 (I)              | ≤ 0.25 (S)   | -                     | negative                    | ≤ 0.25 (S)   | ≤ 0.25 (S)              | -                     | ≤ 1 (S)                | -                     |
| MRSA ST22/t223  | ≤ 0.5 (S)              | -                      | positive               | ≥ 4 (R)    | blaZ, mecA            | ≤ 0.5 (I)              | ≤ 0.25 (S)   | -                     | negative                    | ≤ 0.25 (S)   | ≤ 0.25 (S)              | -                     | ≥ 16 R                 | tet(K)                |
| MRSA ST45/t015  | 4 (R)                  | aac(6')-aph(2'')       | positive               | ≥ 4 (R)    | blaZ, mecA            | ≤ 0.5 (I)              | ≤ 0.25 (S)   | grlA p.I45M           | negative                    | ≤ 0.25 (S)   | ≤ 0.25 (S)              | -                     | ≤ 1 (S)                | -                     |
| MRSA ST30/t300  | ≤ 0.5 (S)              | -                      | positive               | ≥ 4 (R)    | blaZ, mecA            | ≤ 0.5 (I)              | ≤ 0.25 (S)   | -                     | positive                    | ≥ 8 (R)      | ≤ 0.25 (R) <sup>c</sup> | erm(C)                | ≥ 16 R R               | tet(K)                |
| MRSA ST59/t216  | ≤ 0.5 (S)              | -                      | positive               | ≥ 4 (R)    | blaZ, mecA            | ≤ 0.5 (I)              | ≤ 0.25 (S)   | -                     | negative                    | ≤ 0.25 (S)   | ≤ 0.25 (S)              | -                     | ≤ 1 (S)                | -                     |
| MRSA ST1/t127   | ≤ 0.5 (S)              | aph(3')-III, ant(6)-Ia | positive               | ≥ 4 (R)    | blaZ, mecA            | ≤ 0.5 (I)              | ≤ 0.25 (S)   | -                     | positive                    | ≥ 8 (R)      | ≤ 0.25 (R) <sup>c</sup> | erm(C)                | ≥ 16 R                 | tet(K)                |
| MRSA ST398/t034 | ≤ 0.5 (S)              | ant(9)-Ia, str         | positive               | ≥ 4 (R)    | blaZ, mecA            | 1 (I)                  | ≤ 0.25 (S)   | -                     | negative                    | ≥ 8 (R)      | ≥ 8 (R)                 | erm(A)                | ≥ 16 R                 | tet(M)                |
| MSSA ST45       | ≤ 0.5 (S)              | -                      | negative               | ≤ 0.25 (S) | -                     | ≤ 0.5 (I)              | ≤ 0.25 (S)   | -                     | negative                    | ≤ 0.25 (S)   | ≤ 0.25 (S)              | -                     | ≤ 1 (S)                | -                     |
| MSSA ATCC 6538  | ≤ 0.5 (S)              | -                      | negative               | ≤ 0.25 (S) | -                     | ≤ 0.5 (I)              | ≤ 0.25 (S)   | grlA p.I45M           | negative                    | ≤ 0.25 (S)   | ≤ 0.25 (S)              | -                     | ≤ 1 (S)                | -                     |

<sup>a</sup>Values represent minimal inhibitory concentrations (mg/L) as detected by VITEK AST as well as the S-I-R classification (in parenthesis) according to EUCAST; Results of screening reactions are presented as positive or negative

<sup>b</sup>Genes or mutations (fluoroquinolones) detected in the genome of sequenced isolates are indicated if present

<sup>c</sup>Inducible resistance (IR) against clindamycin resulting in the classification as resistant (R) despite MIC values ≤ 0.25 mg/L
